# Supplementary material for: Effects of peer health education on perception and practice of screening for cervical cancer among urban residential women in south-east Nigeria: a before and after study
Source: Springer Nature journal article supplement (doi:10.1186/s12905-017-0399-6), 2017-06-09
Supplement: MOESM1 [file 12353622]

## **APPENDIX: QUESTIONNAIRE FOR DATA COLLECTION ON KNOWLEDGE, PERCEPTION AND PRACTICE OF SCREENING FOR CERVICAL CANCER**

### **SECTION A: PERSONAL DATA**

Mark (v) in the spaces provided, where appropriate. Only one tick is required per question.

Research Identification number:- .....

1. Age at last birthday .....
2. Marital status
  - a. Married [ ]
  - b. Never married [ ]
  - c. Divorced/Separated [ ]
  - d. Widowed [ ]
  - e. Living with partner/Co-habiting [ ]
3. Tribe
  - a. Igbo [ ]
  - b. Yoruba [ ]
  - c. Hausa [ ]
  - d. Other, please specify .....
4. Religion
  - a. Christianity [ ]
  - b. Islam [ ]
  - c. Traditional [ ]
5. Highest level of education
  - a. No formal education [ ]
  - b. Primary school: completed [ ] Not completed [ ]
  - c. Secondary school: completed [ ] Not completed [ ]
  - d. Tertiary school: completed [ ] Not completed [ ]
6. Employment status
  - a. Employed [ ]
  - b. Self employed [ ]
  - c. Unemployed [ ]
  - d. Student [ ]
7. Number of children
  - a. One [ ]
  - b. Two [ ]
  - c. Three [ ]
  - d. Four [ ]
  - e. Above four [ ]

### **SECTION C: PERCEPTION AND ATTITUDE TO CERVICAL CANCER AND CERVICAL CANCER SCREENING**

1. Have you ever heard of cervical cancer or cancer of the cervix?  
Yes [ ] No [ ]
2. How serious is cervical cancer compared to other forms of cancer
  - a. More severe than other cancers [ ]
  - b. Same as other cancers [ ]
  - c. Less severe than other cancers [ ]
  - d. Don't know [ ]
3. Is cancer of the cervix curable?
  - a. Never [ ]

- b. Yes, if detected early [ ]
  - c. Always [ ]
  - d. Don't know [ ]
4. Is there any possibility that you could have cancer of the cervix?
- a. Yes [ ]
  - b. Maybe [ ]
  - c. No [ ]
  - d. Don't know [ ]
5. How would you judge your risk of developing cervical cancer?
- a. High risk [ ]
  - b. Low risk [ ]
  - c. No risk [ ]
  - d. Don't know [ ]
6. What do you think about screening for cervical cancer?
- a. It is not important [ ]
  - b. It is very important [ ]
  - c. It is important [ ]
  - d. I feel indifferent about it [ ]
  - e. I don't have any opinion about it [ ]
7. What do you think about screening regularly for cervical cancer?
- a. It is always necessary [ ]
  - b. It is only necessary if there was a bad result [ ]
  - c. It is not necessary [ ]
  - d. I feel indifferent about it
  - e. I don't have any opinion about it [ ]
8. What are the benefits of screening for cervical cancer? (*you can choose more than one answer*)
- a. It can detect cervical cancer early [ ]
  - b. It gives me a sense of control [ ]
  - c. There are no benefits [ ]
  - d. I don't know of any benefits [ ]
  - e. Others (*please specify*) .....
9. Would you accept to screen for cervical cancer if the services are available?
- a. Yes [ ]
  - b. No [ ]
  - c. Maybe [ ]
  - d. Never [ ]
10. If you ticked "Maybe", what conditions would make you accept it or not accept it?
- .....
- .....

#### SECTION D: UTILIZATION OF CERVICAL CANCER SCREENING SERVICES AND DETERMINANTS

1. Have you ever screened for cervical cancer?
- a. Yes [ ]
  - b. No [ ]

*If you answered No to question 1, move to question 6. If Yes, continue with question 2.*

2. When was the last time you screened for cervical cancer?
- a. < 1 year [ ]
  - b. Over a year ago, but not up to 3 years ago [ ]
  - c. More than 3 years ago [ ]

- d. More than 10 years ago [ ]
  - e. Can't remember [ ]
3. How often do you screen for cervical cancer?
- a. Regularly, every 1-3 years [ ]
  - b. Anytime I remember [ ]
  - c. Whenever I hear someone died of cancer [ ]
  - d. Whenever my doctor says so [ ]
  - e. Don't know [ ]
  - f. Others, *(please specify)*.....
4. What method did you use the last time you screened for cervical cancer?
- a. Pap smear test [ ]
  - b. Visual Inspection with Lugol's Iodine (VILI) [ ]
  - c. Visual Inspection with Acetic Acid (VIA) [ ]
  - d. Don't know the name [ ]
  - e. Others, *(please specify)* .....
5. Why do you screen for cervical cancer? *(you can choose more than one answer)*
- a. I can afford the cost of screening [ ]
  - b. Because if it is detected early, it can be cured [ ]
  - c. Because I could have the disease [ ]
  - d. Because my doctor recommends it [ ]
  - e. Because cervical cancer kills and I don't want to die from it [ ]
  - f. My family encourages me too [ ]
  - g. My friend died of cervical cancer [ ]
  - h. A close relation died of cancer [ ]
  - i. Others *(please specify)* .....
6. Why don't you screen for cervical cancer? *(you can choose more than one answer)*
- a. I don't know any screening tests [ ]
  - b. Because I can't have cervical cancer [ ]
  - c. I am scared of receiving a bad result [ ]
  - d. I don't have any symptoms [ ]
  - e. It's a waste of money [ ]
  - f. It is against my faith [ ]
  - g. It is expensive [ ]
  - h. There is no screening center near my house [ ]
  - i. Our culture forbids it [ ]
  - j. I will become infertile [ ]
  - k. I hear it is painful [ ]
  - l. Others *(please specify)* .....
7. Could you suggest ways of improving women's knowledge of cervical cancer and screening for cervical cancer.
- .....
- .....
- .....
- .....
